# Supplementary material for: Myocardial Injury After Ischemia/Reperfusion Is Attenuated By Pharmacological Galectin-3 Inhibition
Source: PubMed Central journal article supplement (PMC6610618; doi:10.1038/s41598-019-46119-6), 2019-07-03
Supplement: 41598_2019_46119_MOESM1_ESM.pdf [file 41598_2019_46119_MOESM1_ESM.pdf]

**MYOCARDIAL INJURY AFTER ISCHEMIA/REPERFUSION IS  
ATTENUATED BY PHARMACOLOGICAL GALECTIN-3 INHIBITION**

Jaime Ibarrola<sup>1</sup>, Lara Matilla<sup>1</sup>, Ernesto Martinez-Martinez<sup>1</sup>, Alexandre Gueret<sup>2</sup>, Amaya Fernández-Celis<sup>1</sup>, Jean-Paul Henry<sup>2,3</sup>, Lionel Nicol<sup>2,3</sup>, Frederic Jaisser<sup>4,5</sup>, Paul Mulder<sup>2,3</sup>, Antoine Ouvrard-Pascaud<sup>†2,3</sup>, Natalia López-Andrés<sup>†\*1,5</sup>

† These authors contributed equally to this work.

<sup>1</sup> Cardiovascular Translational Research. Navarrabiomed, Complejo Hospitalario de Navarra (CHN), Universidad Pública de Navarra (UPNA), IdiSNA. Pamplona. Spain; <sup>2</sup> Normandie University UNIROUEN, <sup>3</sup> INSERM UMR1096, Rouen, France ; <sup>4</sup> Inserm 1138, Institut des Cordeliers, Paris, France. <sup>5</sup> INSERM Institut National de la Santé et de la Recherche Médicale, Centre d'Investigations Cliniques-Plurithématique 1433, UMR 1116 Université de Lorraine, CHRU de Nancy, France

**SUPPLEMENTARY MATERIAL**

**Table S1: Primers used in rats in real time PCR analysis**

| <b>Gene</b>                     | <b>Primer</b> | <b>Sequence (5' to 3')</b>        |
|---------------------------------|---------------|-----------------------------------|
| <b><math>\alpha</math>-SMA</b>  | Forward       | GAA GGA ATA GCC ACG CTC AG        |
|                                 | Reverse       | TGT GCT GGA CTC TGG AGA TG        |
| <b><math>\beta</math>-actin</b> | Forward       | CCT CTA TGC CAA CAC AGT GCT GTC T |
|                                 | Reverse       | GCT CAG GAG GAG CAA TGA TCT TGA   |
| <b>Col 1a1</b>                  | Forward       | GCC TCC CAG AAC ATC ACC TA        |
|                                 | Reverse       | ATG TCT GTC TTG CCC CAA GT        |
| <b>Col 3a1</b>                  | Forward       | CTCACCTGCTTCACCCCTCTC             |
|                                 | Reverse       | TGGACATATTGCACAACATTCTC           |
| <b>TFG-<math>\beta</math></b>   | Forward       | CAG AAG TTG GCA TGG TAG CC        |
|                                 | Reverse       | TGC TTC AGC TCC ACA GAG AA        |
| <b>CTGF</b>                     | Forward       | GAG TCG TCT CTG CAT GGT CA        |
|                                 | Reverse       | CCA CAG AAC TTA GCC CGG TA        |
| <b>HPRT</b>                     | Forward       | AGG ACC TCT CGA AGT GT            |
|                                 | Reverse       | ATTCAAATCCCTGAAGTACTCAT           |
| <b>CCL2</b>                     | Forward       | TTC CTT ATT GGG GTC AGC AC        |
|                                 | Reverse       | CAG TTA ATG CCC CAC TCA C         |
| <b>OPN</b>                      | Forward       | ATG AGA CTG GCA GTG GTT           |
|                                 | Reverse       | GCT TTC ATT GGA GTT GCT           |
| <b>Fibronectin</b>              | Forward       | GGG GTC ACG TAC CTC TTC AA        |
|                                 | Reverse       | TGG AGG TTA GTG GGA GCA TC        |
